# Supplementary material for: Assessment of Knowledge, Attitudes, and Practices towards New Coronavirus (SARS-CoV-2) of Health Care Professionals in Greece before the Outbreak Period
Source: MDPI journal article supplement (doi:10.3390/ijerph17144925), 2020-07-08
Supplement: s1 [file s1]

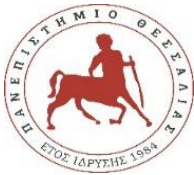

University of Thessaly  
School of Health Sciences  
Department of Nursing

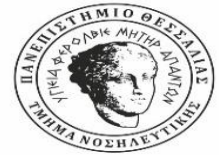

Department of Respiratory Medicine, Medical School,  
University Hospital of Larissa.

K.A.P STUDY FOR THE RECENT EPIDEMIC OF (2019-nCoV) IN HEALTH CARE PROFESSIONALS

DEMOGRAPHICS

|                    |                                                                           |                    |                                                                                                                                         |
|--------------------|---------------------------------------------------------------------------|--------------------|-----------------------------------------------------------------------------------------------------------------------------------------|
| Age (years): ..... | Sex: male <input type="checkbox"/><br><br>female <input type="checkbox"/> | Nationality: ..... | Municipal: .....<br><br>Work place:<br><br>Hospital <input type="checkbox"/><br><br>Primary Health care center <input type="checkbox"/> |
|--------------------|---------------------------------------------------------------------------|--------------------|-----------------------------------------------------------------------------------------------------------------------------------------|

|                                                                                                                                              |
|----------------------------------------------------------------------------------------------------------------------------------------------|
| Occupation:      Physician <input type="checkbox"/> Nurse <input type="checkbox"/> Paramedics <input type="checkbox"/><br>Years at work..... |
|----------------------------------------------------------------------------------------------------------------------------------------------|

|                                                                                                                                   |                                         |
|-----------------------------------------------------------------------------------------------------------------------------------|-----------------------------------------|
| 1. (Q1) Have you travelled at the past 6 months out of Greece?<br><br><input type="checkbox"/> Yes<br><input type="checkbox"/> No | If Yes country/countries .....<br>..... |
|-----------------------------------------------------------------------------------------------------------------------------------|-----------------------------------------|

|                                                                                                                                                    |                                         |
|----------------------------------------------------------------------------------------------------------------------------------------------------|-----------------------------------------|
| 2. (Q2) Have been travelled familiar person at the past 6 months out of Greece?<br><br><input type="checkbox"/> Yes<br><input type="checkbox"/> No | If Yes country/countries .....<br>..... |
|----------------------------------------------------------------------------------------------------------------------------------------------------|-----------------------------------------|

|                                                                 |                                                   |                                                                                                                                                                                                                                                                                                                                                 |                                    |                                              |                                   |                                                   |                            |  |
|-----------------------------------------------------------------|---------------------------------------------------|-------------------------------------------------------------------------------------------------------------------------------------------------------------------------------------------------------------------------------------------------------------------------------------------------------------------------------------------------|------------------------------------|----------------------------------------------|-----------------------------------|---------------------------------------------------|----------------------------|--|
| 3. (Q.3.1) H What is your source of information for SARS-CoV-2? | <input type="checkbox"/> Yes                      | Q.3.2 If yes source of information;<br><table border="0"><tr><td><input type="checkbox"/> Physician</td><td><input type="checkbox"/> Web/Web pages/blogs</td></tr><tr><td><input type="checkbox"/> TV/Radio</td><td><input type="checkbox"/> Web page of Hellenic CDC</td></tr><tr><td colspan="2">Other-please specify .....</td></tr></table> | <input type="checkbox"/> Physician | <input type="checkbox"/> Web/Web pages/blogs | <input type="checkbox"/> TV/Radio | <input type="checkbox"/> Web page of Hellenic CDC | Other-please specify ..... |  |
|                                                                 | <input type="checkbox"/> Physician                | <input type="checkbox"/> Web/Web pages/blogs                                                                                                                                                                                                                                                                                                    |                                    |                                              |                                   |                                                   |                            |  |
| <input type="checkbox"/> TV/Radio                               | <input type="checkbox"/> Web page of Hellenic CDC |                                                                                                                                                                                                                                                                                                                                                 |                                    |                                              |                                   |                                                   |                            |  |
| Other-please specify .....                                      |                                                   |                                                                                                                                                                                                                                                                                                                                                 |                                    |                                              |                                   |                                                   |                            |  |
| <input type="checkbox"/> No                                     |                                                   |                                                                                                                                                                                                                                                                                                                                                 |                                    |                                              |                                   |                                                   |                            |  |

4. (Q4) Can SARS-CoV-2 be transmitted sexually?

☐ Fully agree                      ☐ Agree                      ☐ Disagree                      ☐ Fully disagree                      ☐ Uncertain

5. (Q5) Can SARS-CoV-2 be transmitted by the consumption of foods?

☐ Fully agree                      ☐ Agree                      ☐ Disagree                      ☐ Fully disagree                      ☐ Uncertain

6. (Q6) Can SARS-CoV-2 be transmitted by respiratory droplets?

☐ Fully agree                      ☐ Agree                      ☐ Disagree                      ☐ Fully disagree                      ☐ Uncertain

7. (Q7) Is the COVID-19 a cause for serious illness and death?

☐ Fully agree                      ☐ Agree                      ☐ Disagree                      ☐ Fully disagree                      ☐ Uncertain

8. (Q8) Can these symptoms of COVID-19 be similar with those of seasonal flu?

☐ Fully agree                      ☐ Agree                      ☐ Disagree                      ☐ Fully disagree                      ☐ Uncertain

9. (Q9) Do you know the recommendations of WHO for COVID-19?

Yes ☐                      No ☐                      ☐ Uncertain

10. (Q10) Are the recommendations by the Greek health authorities on covid-19 sufficient?

☐ Fully agree                      ☐ Agree                      ☐ Disagree                      ☐ Fully disagree                      ☐ Uncertain

11. (Q11) Is there an available specific drug therapy for COVID-19?                      ☐ Yes                      ☐ No                      ☐ Uncertain

12. (Q12) Is there an available vaccine for COVID-19?                      ☐ Yes                      ☐ No                      ☐ Uncertain

13. (Q13) Do you believe that the washing of hands reduces the risk of infection from SARS-CoV-2?

☐ Fully agree                      ☐ Agree                      ☐ Disagree                      ☐ Fully disagree                      ☐ Uncertain

|                                                                                                                    |                              |
|--------------------------------------------------------------------------------------------------------------------|------------------------------|
| 14. (Q14) If you received special advices by the Hospital infectious committee for COVID-19 would you follow them? | <input type="checkbox"/> Yes |
|                                                                                                                    | <input type="checkbox"/> No  |

15. (Q15) How often do you wash your hands when at work?

☐ Often
 ☐ Very often
 ☐ Before and after contact with the patient/patient's environment
 ☐ Few times
 ☐ At the end of wok

16. (Q16) Will you be vaccinated for SARS-CoV-2?

☐ Yes
 ☐ No
 ☐ I am not answer

17. (Q17) Do you support the ban of travelling for countries with increase cases of SARS-CoV-2?

☐ Fully agree
 ☐ Agree
 ☐ Disagree
 ☐ Fully disagree
 ☐ Uncertain

18. (Q18) How do you judge your level of knowledge about COVID-19

☐ Sufficient
 ☐ Inadequate
 ☐ Other: .....

Thank you for your cooperation.
